# Supplementary material for: Copper-Catalyzed Homocoupling of Boronic Acids: A Focus on B-to-Cu and Cu-to-Cu Transmetalations
Source: MDPI journal article supplement (doi:10.3390/molecules27217517), 2022-11-03
Supplement: s1 [file s1]

# Supporting Information

## Copper-Catalyzed Homocoupling of Boronic Acids:

### A focus on Boron-to-Copper and Copper-to-Copper Transmetalation

Aude Salamé,<sup>1,†</sup> Jordan Rio,<sup>2,†</sup> Ilaria Ciofini,<sup>3,\*</sup> Lionel Perrin,<sup>2,\*</sup>

Laurence Grimaud<sup>1,\*</sup> and Pierre-Adrien Payard<sup>1,2,\*</sup>

E-mail: [ilaria.ciofini@chimieparistech.psl.eu](mailto:ilaria.ciofini@chimieparistech.psl.eu); [lionel.perrin@univ-lyon1.fr](mailto:lionel.perrin@univ-lyon1.fr);

[laurence.grimaud@ens.psl.eu](mailto:laurence.grimaud@ens.psl.eu); [pierre-adrien.payard@univ-lyon1.fr](mailto:pierre-adrien.payard@univ-lyon1.fr)

<sup>†</sup> These authors contributed equally.

<sup>1</sup> Laboratoire des Biomolécules (LBM), Département de Chimie, Ecole Normale Supérieure, PSL University, Sorbonne Université, CNRS, 75005 Paris, France

<sup>2</sup> Université de Lyon, Université Claude Bernard Lyon I, CNRS, INSA, CPE, UMR 5246, ICBMS, F-69622 Villeurbanne cedex, France.

<sup>3</sup> École nationale supérieure de chimie de Paris, Centre national de la recherche scientifique, Institute of Chemistry for Life and Health Sciences, PSL Research University, Paris, France.

## **Table of contents**

- 1.  $^{19}\text{F}\{^1\text{H}\}$  monitoring of Cu(II)-catalyzed homocoupling reactions**
- 2. Cyclic voltammograms and kinetics monitoring of the formation of Cu(I)**
- 3. B-to-Cu(II) transmetalation**
  - 3.1. Pre-equilibria**
  - 3.2. NBO analyses of B-to-Cu transition states**
- 4. Cu-to-Cu transmetalation**
  - 4.1 Speciation of Cu(II)-Cu(II) dimers.**
  - 4.2 Pathways for Cu-Cu transmetalation and reductive elimination.**

# 1. $^{19}\text{F}\{^1\text{H}\}$ monitoring of the Cu(II)-catalyzed homocoupling reaction

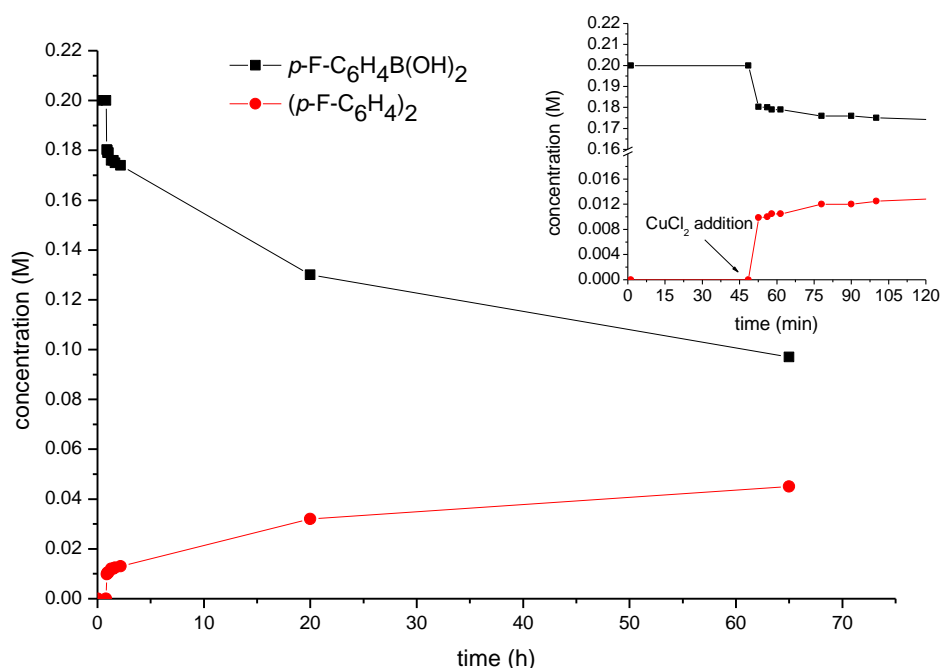

**Figure S1.  $^{19}\text{F}\{^1\text{H}\}$  kinetic monitoring of the reaction of  $p\text{-FPhB(OH)}_2$  (0.2 M) and  $\text{Cu}^{\text{II}}\text{Cl}_2$  (20 mM, 20 mol%) in MeOH in the presence of  $\text{K}_2\text{CO}_3$  (0.2 M, 1 equiv). A solution of  $n\text{Bu}_4\text{BF}_4$  0.1 M in  $\text{d}^6\text{-DMSO}$  contained in a sealed capillary was used as an internal standard (signal at -148.5 ppm). As indicated on the zoomed insert the formation of the homocoupling product proceed very fast when the base is added and a plateau is obtained around 0.01 mol L<sup>-1</sup> corresponding to a stoichiometry of two Cu(II) *per* mol of homocoupling product formed.**

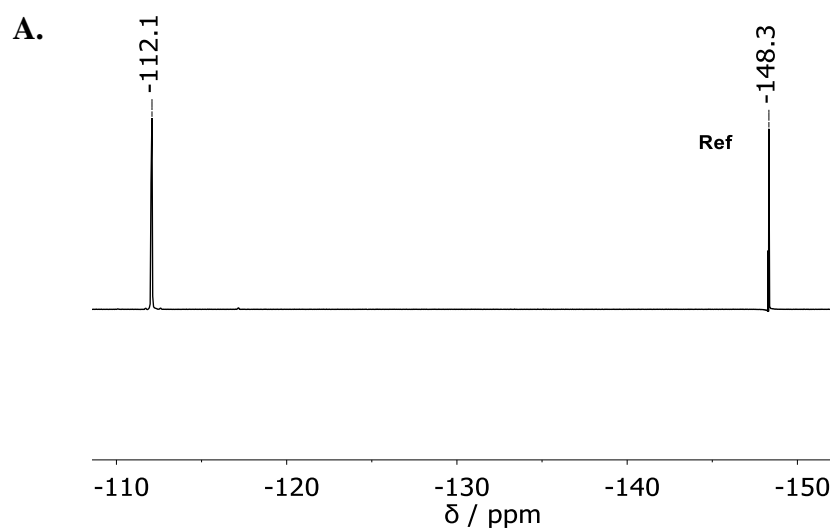

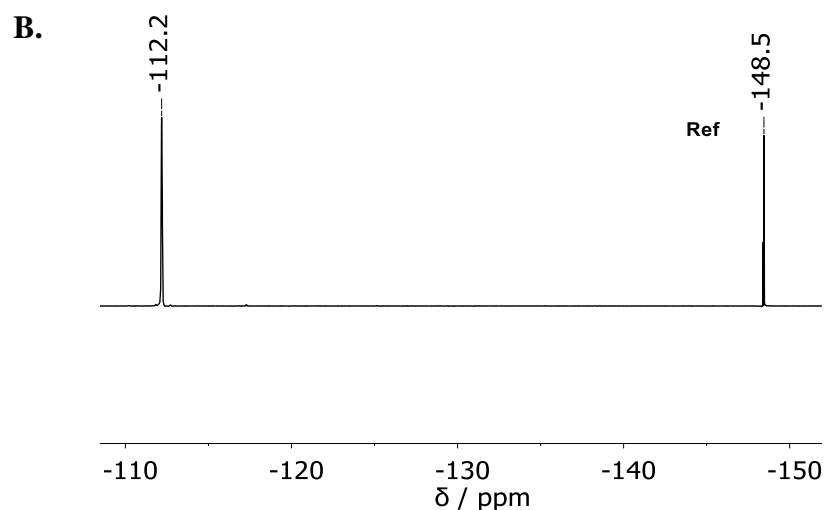

**Figure S2.**  $^{19}\text{F}\{^1\text{H}\}$  NMR spectrum of a solution of  $p\text{-FPhB(OH)}_2$  (20 mM, 2 equiv) and  $\text{Cu}^{\text{II}}\text{Cl}_2$  (10 mM) in MeOH in the absence of added base **A.** at  $t = 0$  h, **B.** after 5h. A solution of  $n\text{Bu}_4\text{BF}_4$  0.1 M in  $\text{d}^6\text{-DMSO}$  contained in a sealed capillary was used as an internal standard (signal at -148.5 ppm).

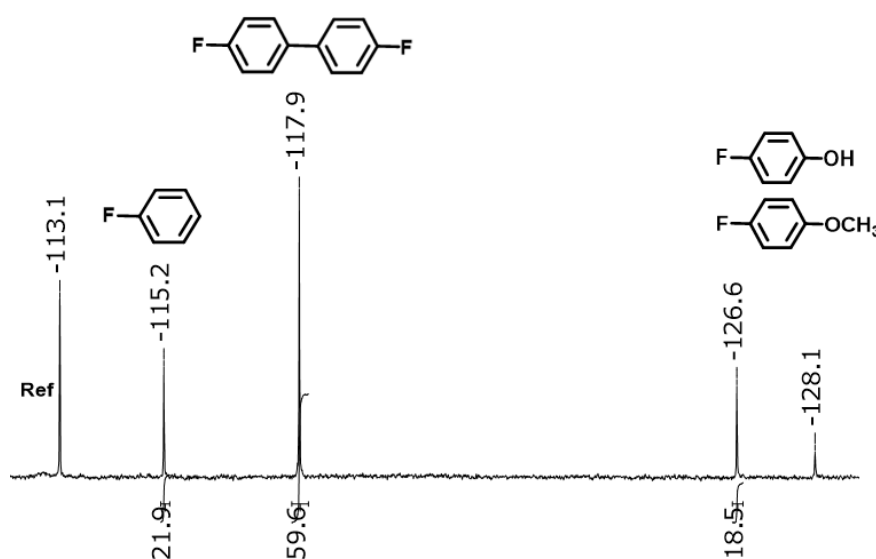

**Figure S3.**  $^{19}\text{F}\{^1\text{H}\}$  NMR spectrum of a solution of  $p\text{-FPhB(OH)}_2$  (20 mM, 20 equiv), TBAOH (12 mM, 12 equiv) and  $\text{CuCl}_2$  (1 mM, 1 equiv) in MeOH. A solution of fluorobenzene in  $\text{d}^6\text{-DMSO}$  contained in a sealed capillary was used as an internal standard (signal at -113.1 ppm). fluorobenzene in MeOH (-115.2 ppm), homocoupling product (-117.9 ppm),  $p\text{-F-phenol}$  (-126.5 ppm) and  $p\text{-F-anisole}$  (-128.1 ppm).

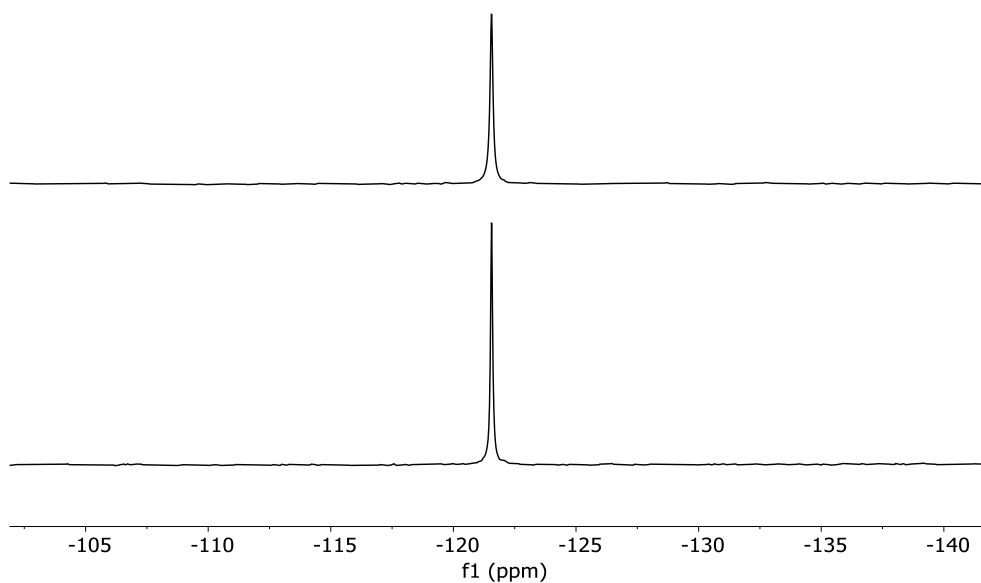

**Figure S4.**  $^{19}\text{F}\{^1\text{H}\}$  NMR spectrum of a solution of  $p\text{-FPhB(OH)}_2$  (20 mM) and TBAOH (1 equiv) in the absence of  $\text{Cu}^{\text{II}}\text{Cl}_2$  in MeOH at  $t = 0$  and  $t = 24$  h. The signal of  $[p\text{-FPhB(OH)}_3]^-$  is detected at -121.6 ppm.

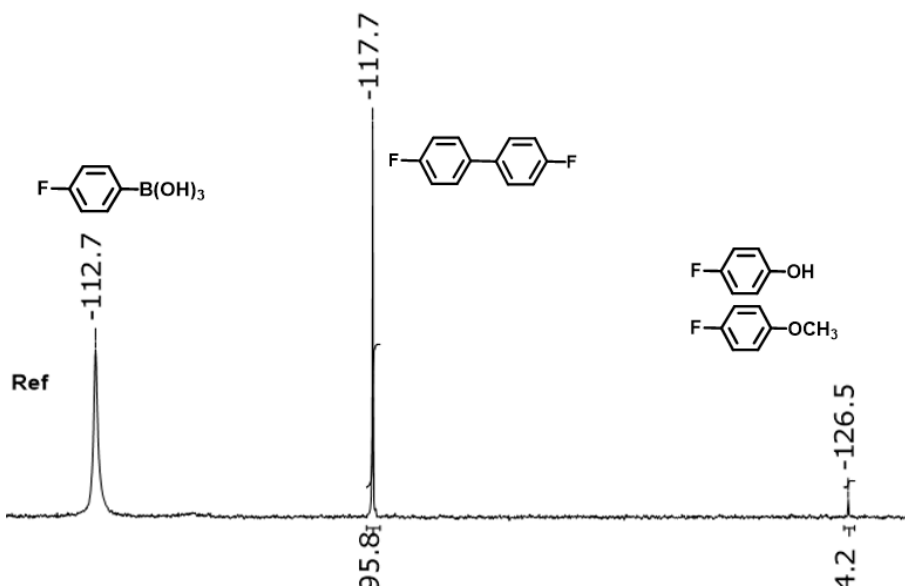

**Figure S5.**  $^{19}\text{F}\{^1\text{H}\}$  NMR spectrum of a solution of  $p\text{-FPhB(OH)}_2$  (20 mM, 1 equiv), TBAOH (12 mM, 0.5 equiv) and  $\text{CuCl}_2$  (20 mM, 1 equiv) in MeOH. A solution of fluorobenzene in  $d^6\text{-DMSO}$  contained in a sealed capillary was used as an internal standard (signal at -113.1 ppm).

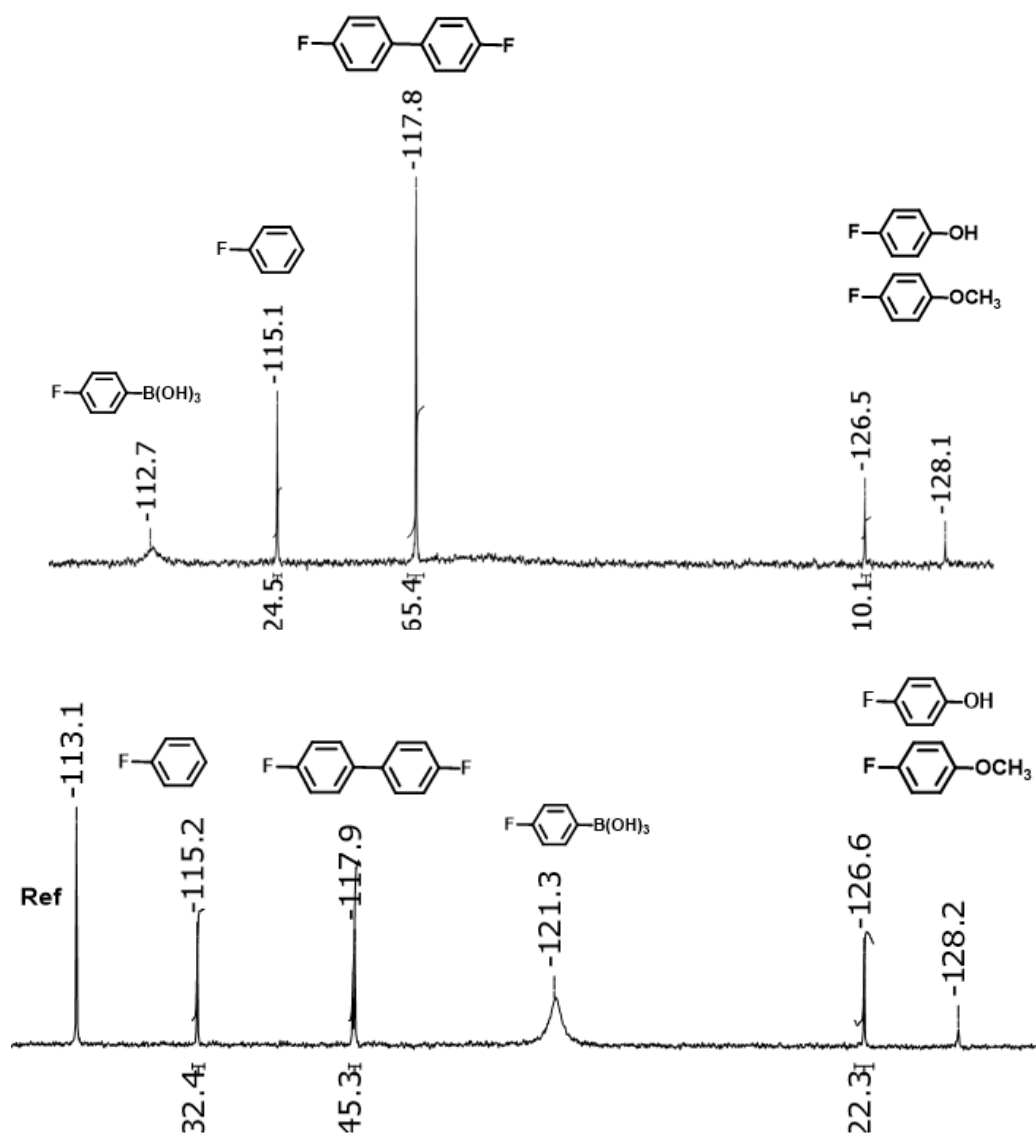

**Figure S6.**  $^{19}\text{F}\{^1\text{H}\}$  NMR spectrum of a solution of *p*-FPhB(OH)<sub>2</sub> (20 mM, 10 equiv) and Cu<sup>II</sup>Cl<sub>2</sub> (2 mM) in MeOH in the presence of **a**) 4 equiv of TBAOH, **b**) 8 equiv of TBAOH. A solution of fluorobenzene in d<sup>6</sup>-DMSO contained in a sealed capillary was used as an internal standard (signal at -113.1 ppm).

## 2. Cyclic Voltammograms and Kinetic Monitoring of the Formation of Cu(I)

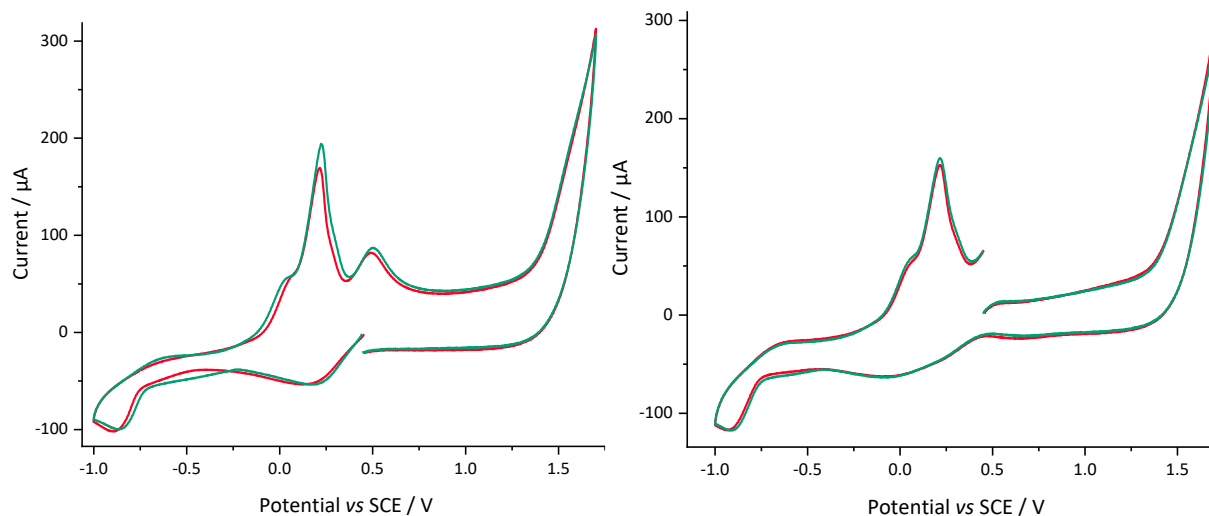

**Figure S7.** Cyclic voltammogram toward reduction (left) and oxidation (right) potentials of a solution of  $\text{CuCl}_2$  (2 mM) in MeOH (red line) and in the presence of  $\text{PhB(OH)}_2$  (10 mM) (green line). Working electrode: glassy carbon ( $\varnothing = 3$  mm); scan rate:  $0.5 \text{ V s}^{-1}$ ; supporting electrolyte:  $\text{nBu}_4\text{BF}_4$  (0.3 M); recorded at ambient temperature starting at the Open Circuit Potential (OCP).

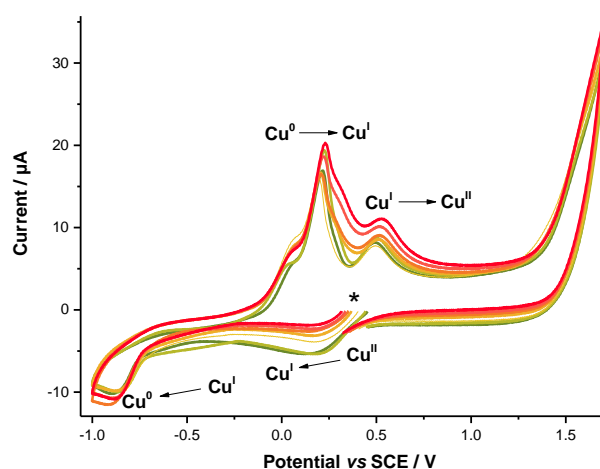

**Figure S8.** Cyclic voltammetry toward reduction potentials monitoring of the reduction of  $\text{Cu(II)}$  ( $\text{CuCl}_2$ , 2 mM) to  $\text{Cu(I)}$  by  $\text{PhB(OH)}_2$  in the presence of TBAOH (Dark green). After addition of  $\text{PhB(OH)}_2$  (10 mM, Light green). (Apple green) Addition of TBAOH (5 mM) at  $t = 0$ . (Light orange) After 20 minutes. (Orange) After 30 minutes. (Red) After 45 minutes. Working electrode: glassy carbon ( $\varnothing = 3$  mm); scan rate:  $0.5 \text{ V s}^{-1}$ ; supporting electrolyte:  $\text{nBu}_4\text{BF}_4$  (0.3 M); recorded at ambient temperature starting at the Open Circuit Potential (OCP).

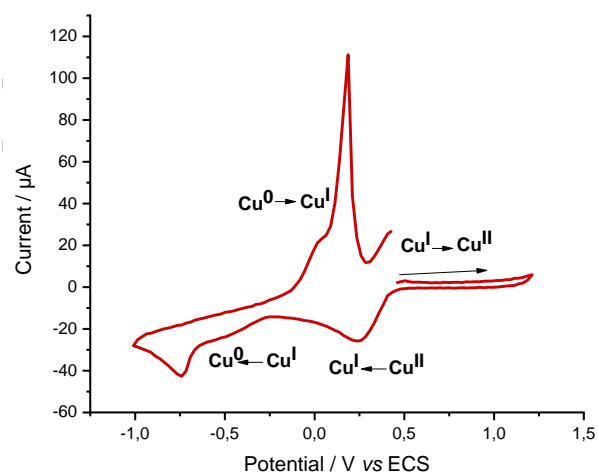

**Figure S9.** Cyclic voltammogram toward oxidation of a solution of  $\text{CuCl}_2$  (2 mM) in MeOH. Working electrode: glassy carbon ( $\varnothing = 3$  mm); scan rate:  $0.5 \text{ V s}^{-1}$ ; supporting electrolyte:  $\text{nBu}_4\text{BF}_4$  (0.3 M) ; recorded at ambient temperature starting at the Open Circuit Potential (OCP).



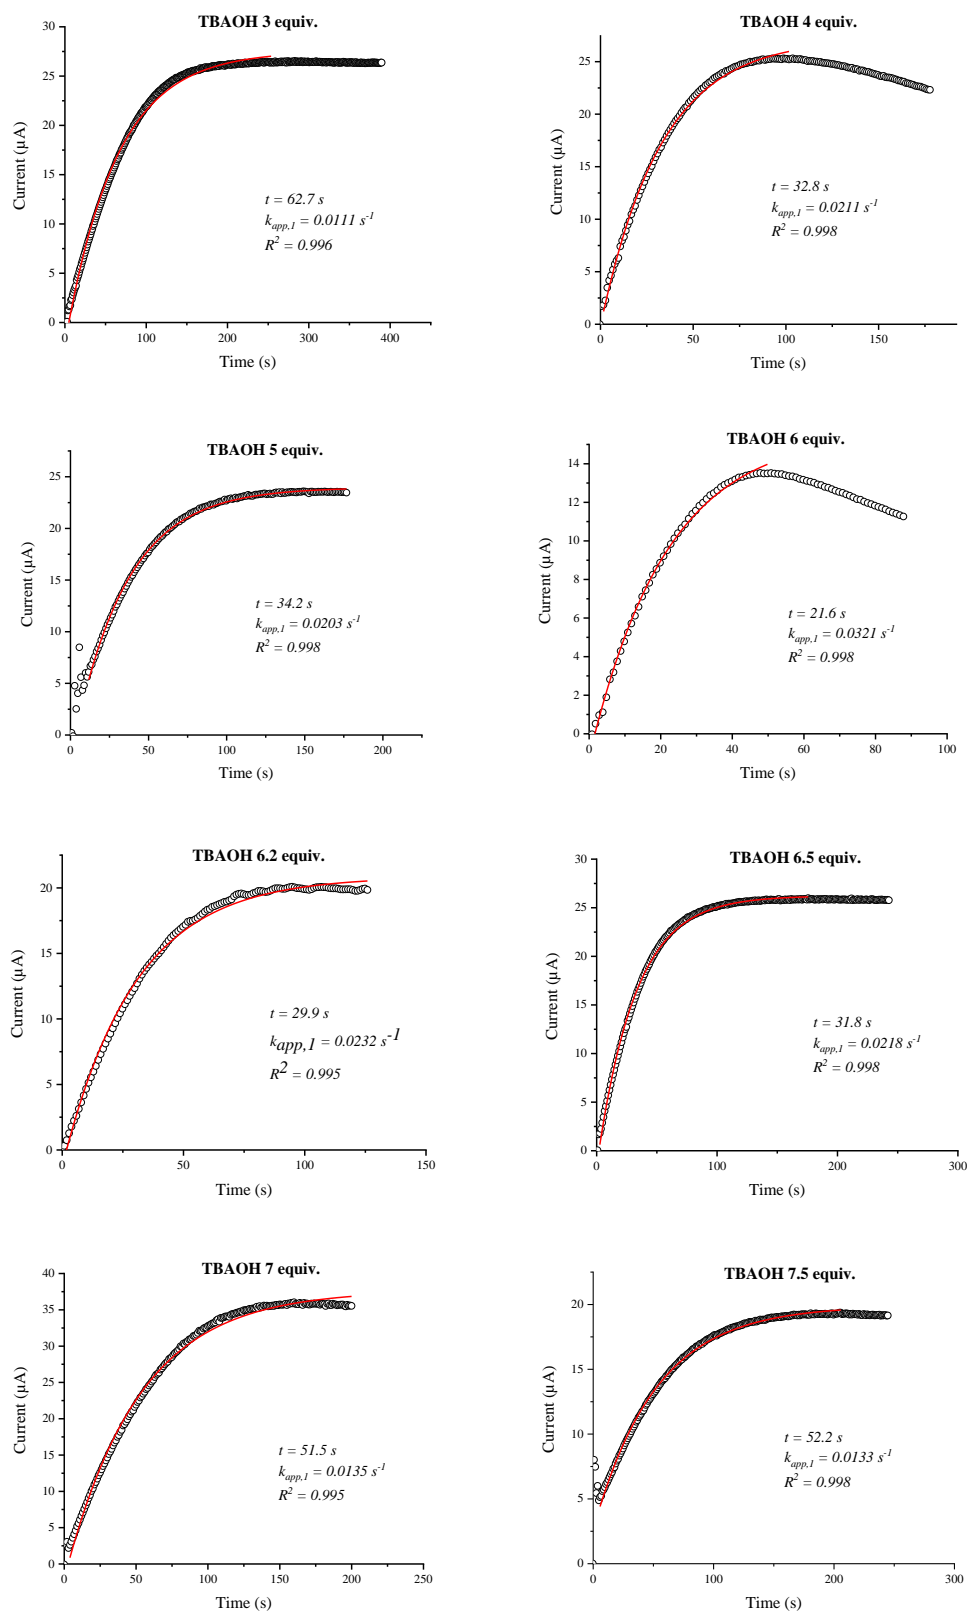

**Figure S10.** Kinetic monitoring of the reduction of  $\text{CuCl}_2$  (1 mM) by  $\text{PhB(OH)}_2$  (10 mM, 10 equiv) in the presence of TBAOH (6 mM, 6 equiv). Working electrode: glassy carbon ( $\varnothing = 3$  mm); rotation rate:  $1000 \text{ min}^{-1}$ , imposed potential +0.7 V/SCE; supporting electrolyte:  $\text{nBu}_4\text{BF}_4$  (0.3 M); thermostat  $20^\circ\text{C}$ , recorded at ambient temperature.

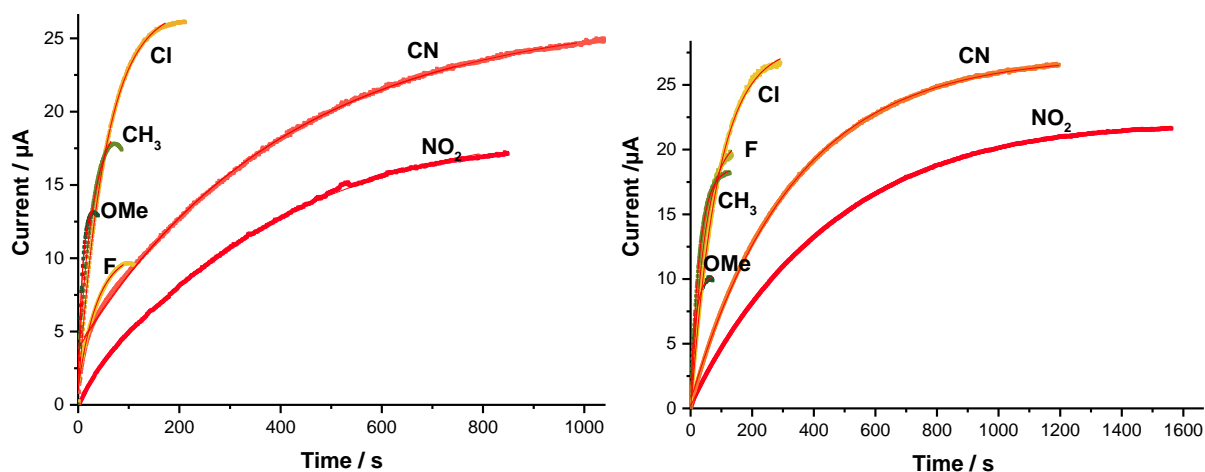

**Figure S11.** Kinetic monitoring of the reduction of CuCl<sub>2</sub> (1 mM) by *p*-X-PhB(OH)<sub>2</sub> (10 mM, 10 equiv, X = MeO, CH<sub>3</sub>, F, Cl, CN et NO<sub>2</sub>) in the presence of TBAOH (4 mM, left / 8 equiv right). Working electrode: glassy carbon ( $\varnothing = 3$  mm); rotation rate: 1000 min<sup>-1</sup>, imposed potential +0.7 V/SCE; supporting electrolyte: nBu<sub>4</sub>BF<sub>4</sub> (0.3 M); thermostat 20 °C, recorded at ambient temperature.

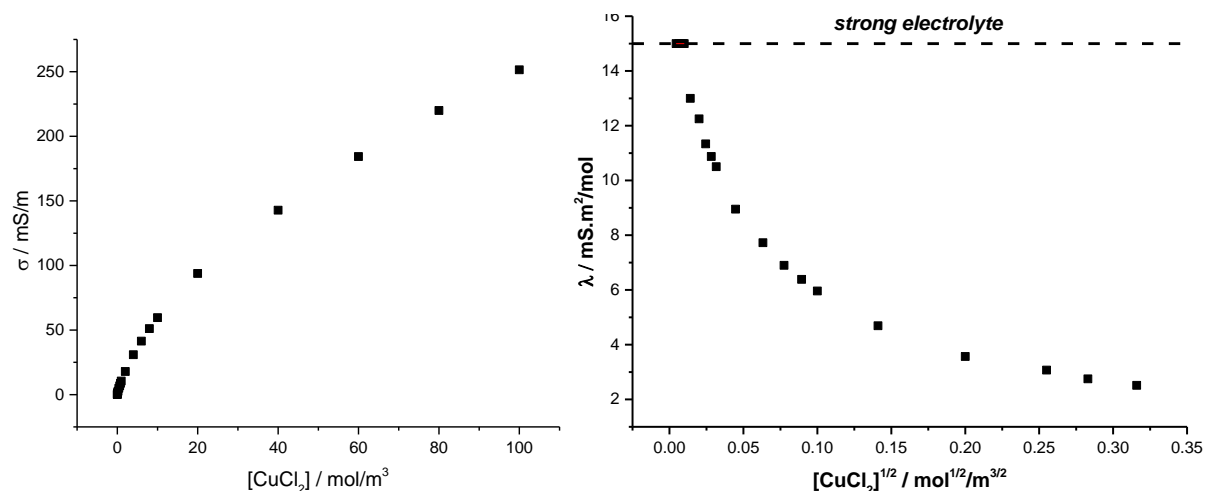

**Figure S12. A.** Evolution of the conductivity ( $\sigma$ , mS m<sup>-1</sup>) versus the concentration of added Cu<sup>II</sup>Cl<sub>2</sub> (mol m<sup>3</sup>). **B.** Evolution of the ionic molar conductivity of the solution  $\lambda$  (mS m<sup>2</sup> mol<sup>-1</sup>) versus the square root of the concentration of added Cu<sup>II</sup>Cl<sub>2</sub> (mol<sup>1/2</sup> m<sup>-3/2</sup>).

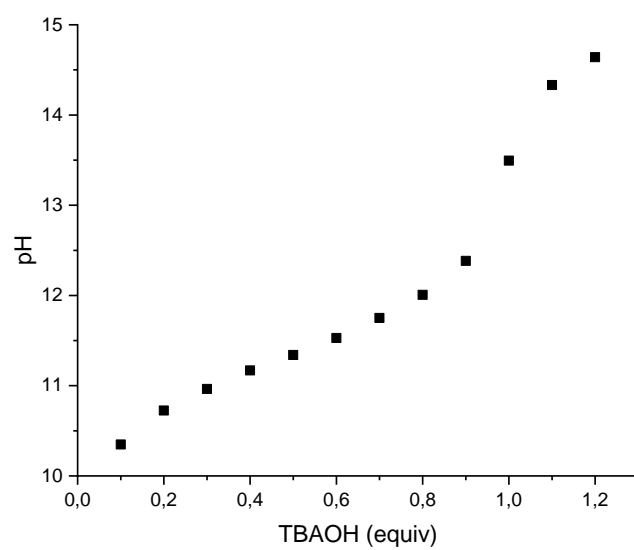

**Figure S13.** Evolution of the pH during the titration of a solution of phenylboronic acid ( $10 \text{ mmol L}^{-1}$ ) by TBAOH ( $1.0 \text{ mol L}^{-1}$  in MeOH). The  $\text{pK}_a$  of the couple  $\text{PhB}(\text{OH})_2/\text{PhB}(\text{OH})_3^-$  can be read 0.5 equiv,  $\text{pK}_a = 11.2$ .

### 3 B-to-Cu(II) transmetalation

Cartesian coordinates of the structures presented herein can be found in the additional **cartesians.xyz** file.

#### 3.1 Alternative pathways

The mechanism of the first B-to-Cu transmetalation was calculated for X = Cl, MeO and HO. The trends obtained for X = HO are similar to those computed with X= MeO.  $\Delta G$  ( $\Delta H$ ) in kcal mol<sup>-1</sup>.

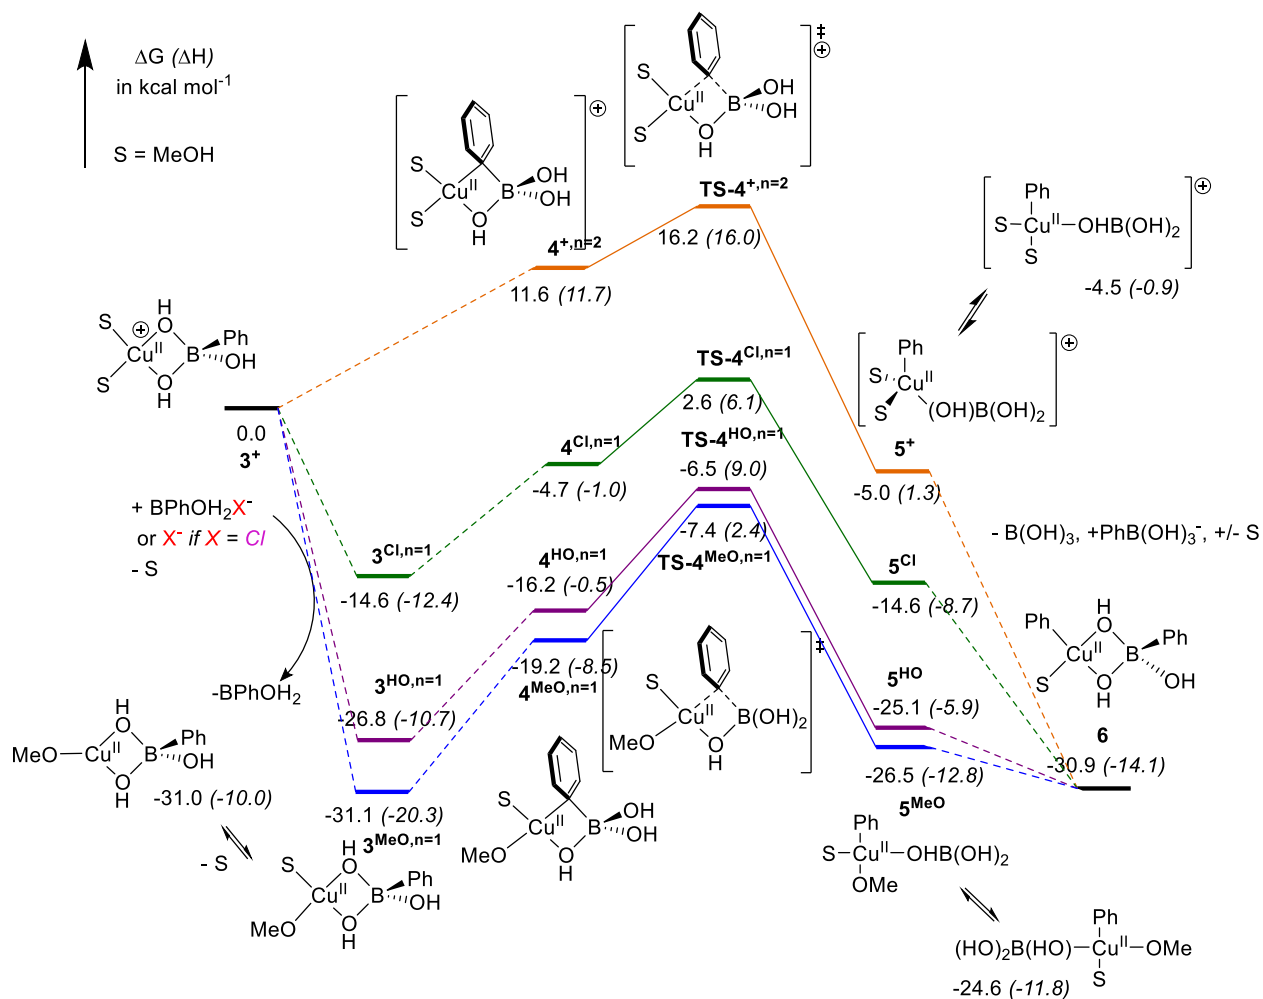

**Figure S14.** Reaction profiles of the Cu-to-B transmetalation starting for i) the heterobimetallic cationic complex  $[(S)_2Cu(\mu-OH)_2B(Ph)(OH)]^+$  ( $3^+$ ) ii) the neutral heterobimetallic intermediate complexes  $[S(X)Cu(\mu-OH)_2B(Ph)(OH)]$  ( $3^X$ ) for X = Cl, OH and MeO, computed at the DFT level. Free energies and enthalpies  $\Delta G$  ( $\Delta H$ ) are given in kcal mol<sup>-1</sup>.

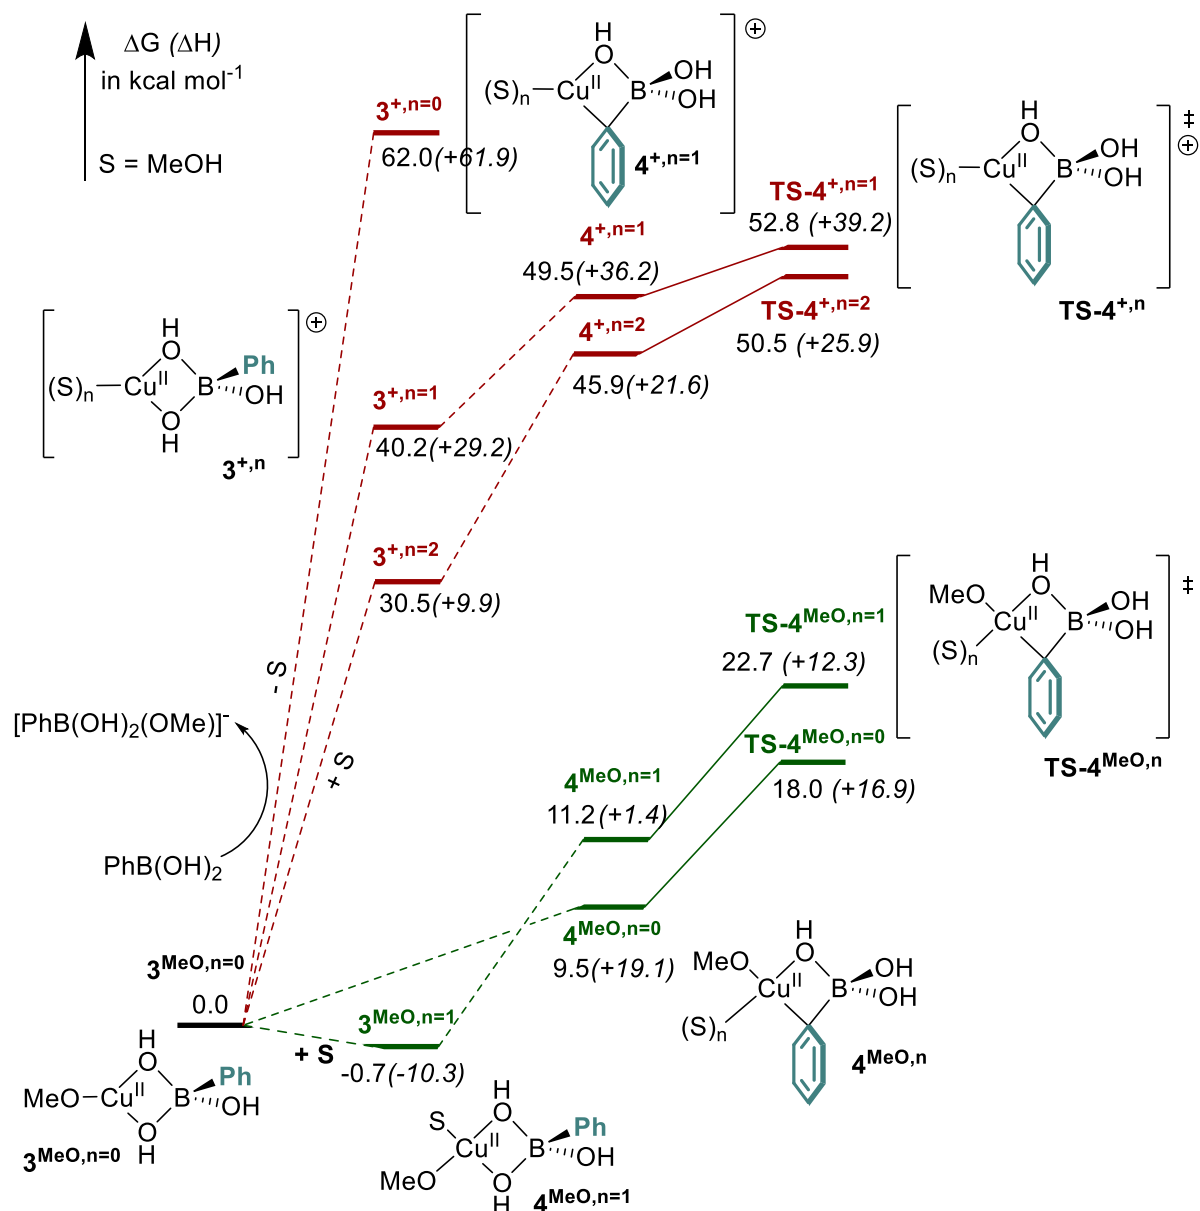

**Figure S15.** Gibbs free energy calculated at the DFT level for the first boron-to-copper transmetalation involving cationic (red) and neutral (X = MeO, green) intermediates for different solvation states (*i.e.*  $n = 0$  to 2 MeOH coordinated to Cu atom). Free energies and enthalpies  $\Delta G$  ( $\Delta H$ ) are given in kcal mol<sup>-1</sup>.

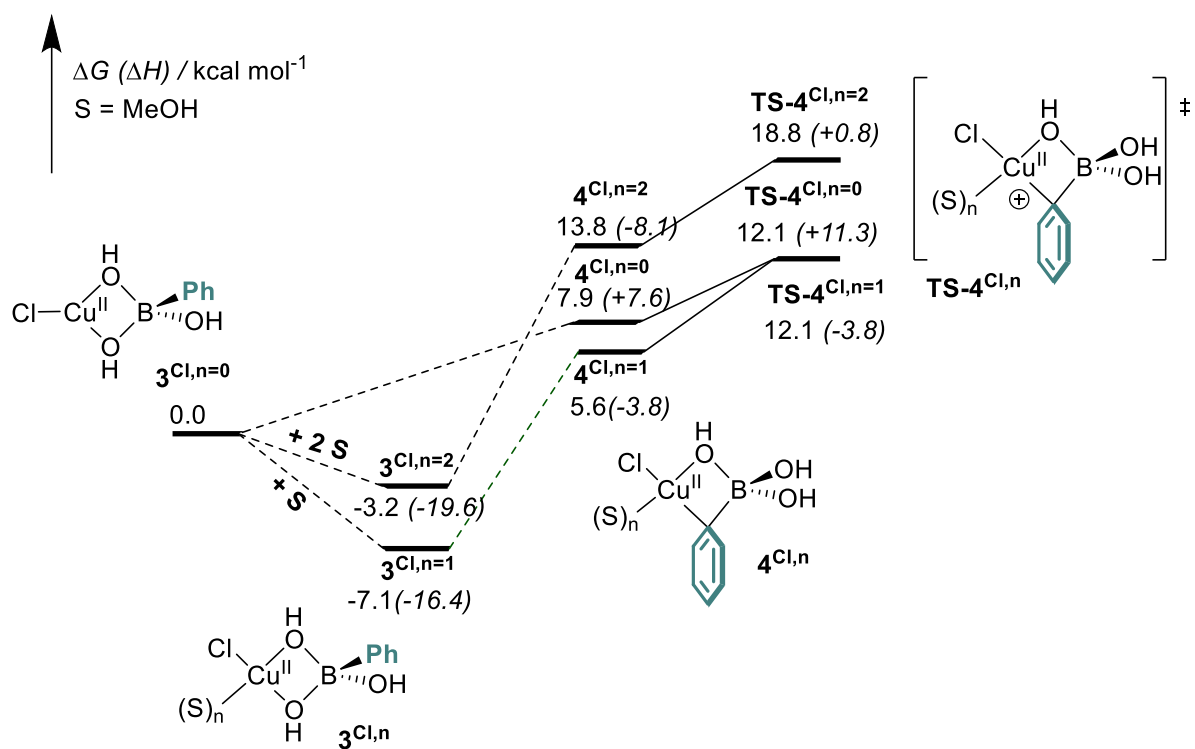

**Figure S16.** Gibbs free energy calculated at the DFT level for the first boron-to-copper transmetalation involving cationic neutral ( $X = \text{Cl}$ ,  $n = 0$  to 2) intermediates for different solvation states. Free energies and enthalpies  $\Delta G (\Delta H)$  are given in  $\text{kcal mol}^{-1}$ .

### 3.2 NBO analyses of B-to-Cu transmetalation transition states

As can be seen in the following table, all TS share a very similar structure. The higher activation of **TS-4<sup>MeO,n=1</sup>** energy can mainly be attributed to its higher partial charge at the Cu atom. In this regard, the large difference in NBO(Cu) for **TS-4<sup>+,n=2</sup>** and **TS-4<sup>Cl,n=1</sup>** should in principle results in higher activation energy for **TS-4<sup>+,n=2</sup>**, however this is not the case probably because the TS is earlier than **TS-4<sup>Cl,n=1</sup>** (*i.e.* Cu-Ph bond length is relatively few elongated (-0.1 Å) compared to 4<sup>+</sup>).

**Table S1.** Comparison of B-to-Cu transition states. Dihedral angles are in degree, distances are in Å, partial charge in atomic unit (1 a.u. = |e<sup>-</sup>|). The numbers indicated between parenthesis correspond to the bond length variation between 4<sup>X,n</sup> and **TS-4<sup>X,n</sup>** (X = MeOH, Cl or MeO).

|                         | <b>TS-4<sup>+,n=2</sup></b>                                                        | <b>TS-4<sup>Cl,n=1</sup></b>                                                        | <b>TS-4<sup>MeO,n=1</sup></b>                                                        |
|-------------------------|------------------------------------------------------------------------------------|-------------------------------------------------------------------------------------|--------------------------------------------------------------------------------------|
|                         | 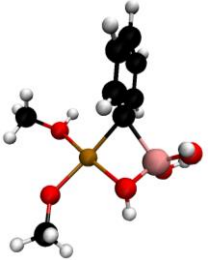 |  |  |
| $\Phi(\text{Cu-C-B-O})$ | -28.9                                                                              | -32.2                                                                               | -31.9                                                                                |
| Cu-Ph                   | 2.1 (-0.1)                                                                         | 2.1 (-0.3)                                                                          | 2.1 (-0.4)                                                                           |
| Cu-X                    | 2.0 (-)                                                                            | 2.3 (-)                                                                             | 1.9 (-)                                                                              |
| Partial charge on Cu    | 1.315                                                                              | 1.256                                                                               | 1.326                                                                                |

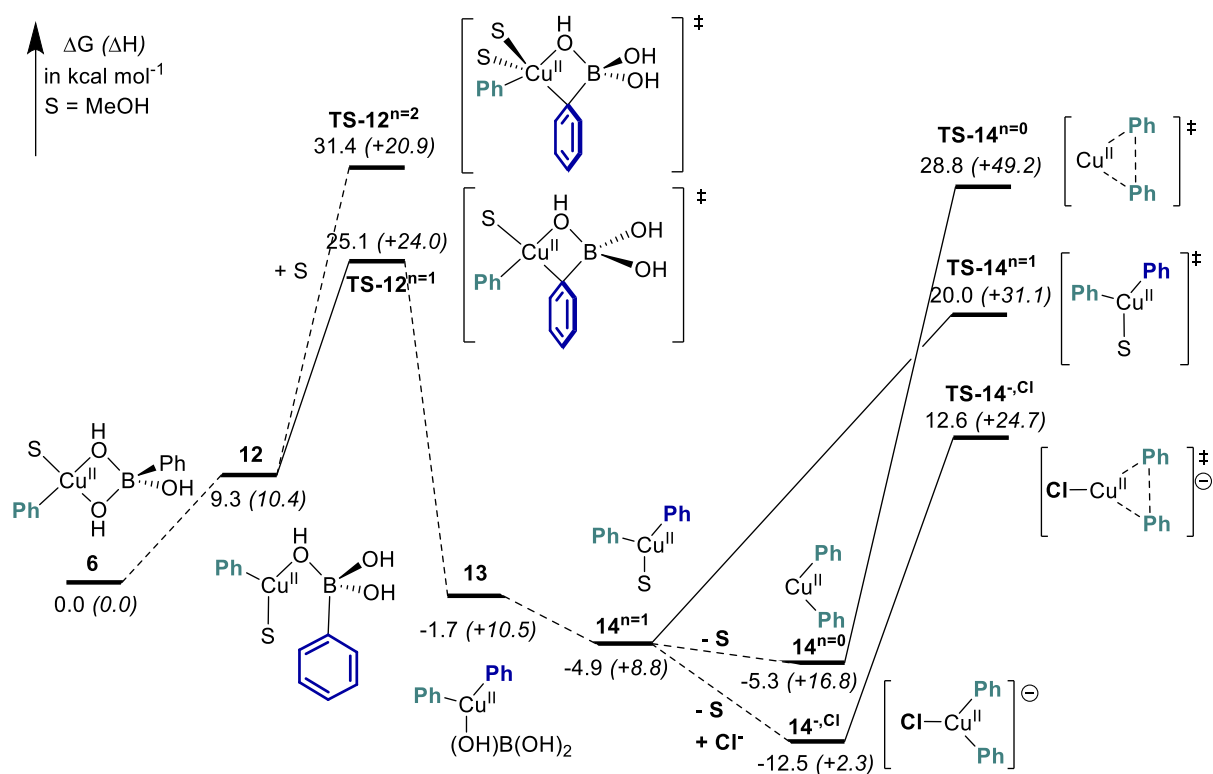

**Figure S17.** Reaction profiles of the second Cu-to-B transmetalation and following reductive elimination on monomeric organocopper starting for organocopper heterobimetallic complex  $[(S)(Ph)Cu(\mu-OH)_2B(Ph)(OH)]$  (**6**) computed at the DFT level. Free energies and enthalpies  $\Delta G$  ( $\Delta H$ ) are given in kcal mol<sup>-1</sup>.



## 4. Cu-to-Cu transmetalation

Cartesian coordinates of the structures presented herein can be found in the additional **cartesians.xyz** file.

### 4.1 Speciation of Cu(II)-Cu(II) dimers.

The solvation of Cu(II)-Cu(II) dimers was explored for all combinations of  $R^1$  and  $R^2$ . ( $R^1, R^2 = \text{Cl, OH and/or MeO}$ ) These results are displayed in **Table S2**. The coordination of solvent molecules is not favorable; however the first coordination of a MeOH molecule at each Cu(II) center is accessible at room temperature.

**Table S2.** Formation free energy of  $\text{Cu}^{\text{II}}\text{-Cu}^{\text{II}}$  dimers with  $R^1, R^2 = \text{Cl, OH and MeO}$  as bridging groups. Gibbs free energy ( $\Delta G$ ,  $\text{kcal mol}^{-1}$ ) and enthalpies ( $\Delta H$ ,  $\text{kcal mol}^{-1}$ ) are calculated using the monomers ( $R^1\text{CuPh}$ ) and ( $R^2\text{CuPh}$ ) as a reference. In some cases, one or more MeOH molecules are de-coordinates from Cu during optimization and these structures are quoted *n.d.* The formation of dimers is favored in basic media ( $^-\text{OH}$  or  $^-\text{OMe}$  present).

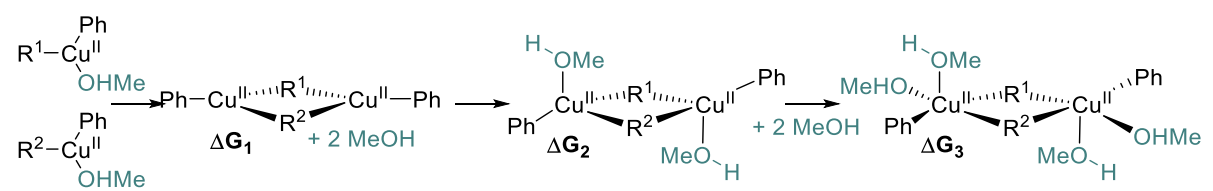

|                                           | $\Delta G_1$ ( $\Delta H_1$ ) | $\Delta G_2$ ( $\Delta H_2$ ) | $\Delta G_3$ ( $\Delta H_3$ ) |
|-------------------------------------------|-------------------------------|-------------------------------|-------------------------------|
| $R^1, R^2 = -\text{Cl}$                   | -2.6 (9.6)                    | 1.5 (-5.4)                    | n.d.                          |
| $R^1, R^2 = -\text{OH}$                   | -21.4 (-14.9)                 | -15.1 (-24.8)                 | n.d.                          |
| $R^1, R^2 = -\text{OMe}$                  | -19.9 (-14.5)                 | -6.3 (-20.6)                  | n.d.                          |
| $R^1 = -\text{Cl} \mid R^2 = -\text{OH}$  | -12.1 (-2.1)                  | -                             | 11.5 (-18.3)                  |
| $R^1 = -\text{Cl} \mid R^2 = -\text{OMe}$ | -12.8 (-3.1)                  | -                             | n.d.                          |
| $R^1 = -\text{OH} \mid R^2 = -\text{OMe}$ | -21.4 (-14.9)                 | -                             | n.d.                          |

The solvation of  $\mu\text{-Ph-}\mu\text{-R}[\text{Cu}(\text{II})\text{-Cu}(\text{II})]$  species was explored for all combinations of  $R^1$  and  $R^2$  and are presented herein. Again, non-solvated dimers are thermodynamically favored, however the first coordination is accessible at room temperature. For  $R^1 = R^2 = \text{Cl}$ , up to 4 MeOH molecules can bind to the dimer ( $\Delta G = 6.5$ ,  $\Delta H = -27.8 \text{ kcal mol}^{-1}$ ).

**Table S3.** Solvation of Cu<sup>II</sup>-Cu<sup>II</sup> dimers with R<sup>1</sup> = Ph as bridging groups.  $\Delta G$  ( $\Delta H$ ) in kcal mol<sup>-1</sup>. In some cases, one or more MeOH molecules are de-coordinate from Cu during optimization and these structures are quoted *n.d.*

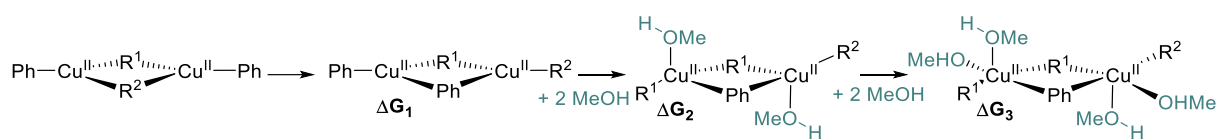

|                                                   | $\Delta G_1$ ( $\Delta H_1$ ) | $\Delta G_2$ ( $\Delta H_2$ ) | $\Delta G_3$ ( $\Delta H_3$ ) |
|---------------------------------------------------|-------------------------------|-------------------------------|-------------------------------|
| <b>R<sup>1</sup>, R<sup>2</sup> = -Cl</b>         | 0.6 (-0.3)                    | 4.4 (-11.6)                   | n.d.                          |
| <b>R<sup>1</sup>, R<sup>2</sup> = -OH</b>         | 10.3 (9.6)                    | 21.0 (3.1)                    | n.d.                          |
| <b>R<sup>1</sup>, R<sup>2</sup> = -OMe</b>        | 8.1 (9.0)                     | n.d.                          | n.d.                          |
| <b>R<sup>1</sup> = -Cl   R<sup>2</sup> = -OH</b>  | 10.1(10.1)                    | 16.1(-0.4)                    | n.d.                          |
| <b>R<sup>1</sup> = -Cl   R<sup>2</sup> = -OMe</b> | 9.4 (9.3)                     | 16.8 (-0.6)                   | n.d.                          |
| <b>R<sup>1</sup> = -OH   R<sup>2</sup> = -Cl</b>  | 0.3 (0.1)                     | 5.9 (-10.9)                   | n.d.                          |

## 4.2. Pathways for Cu-to-Cu transmetalation and reductive elimination.

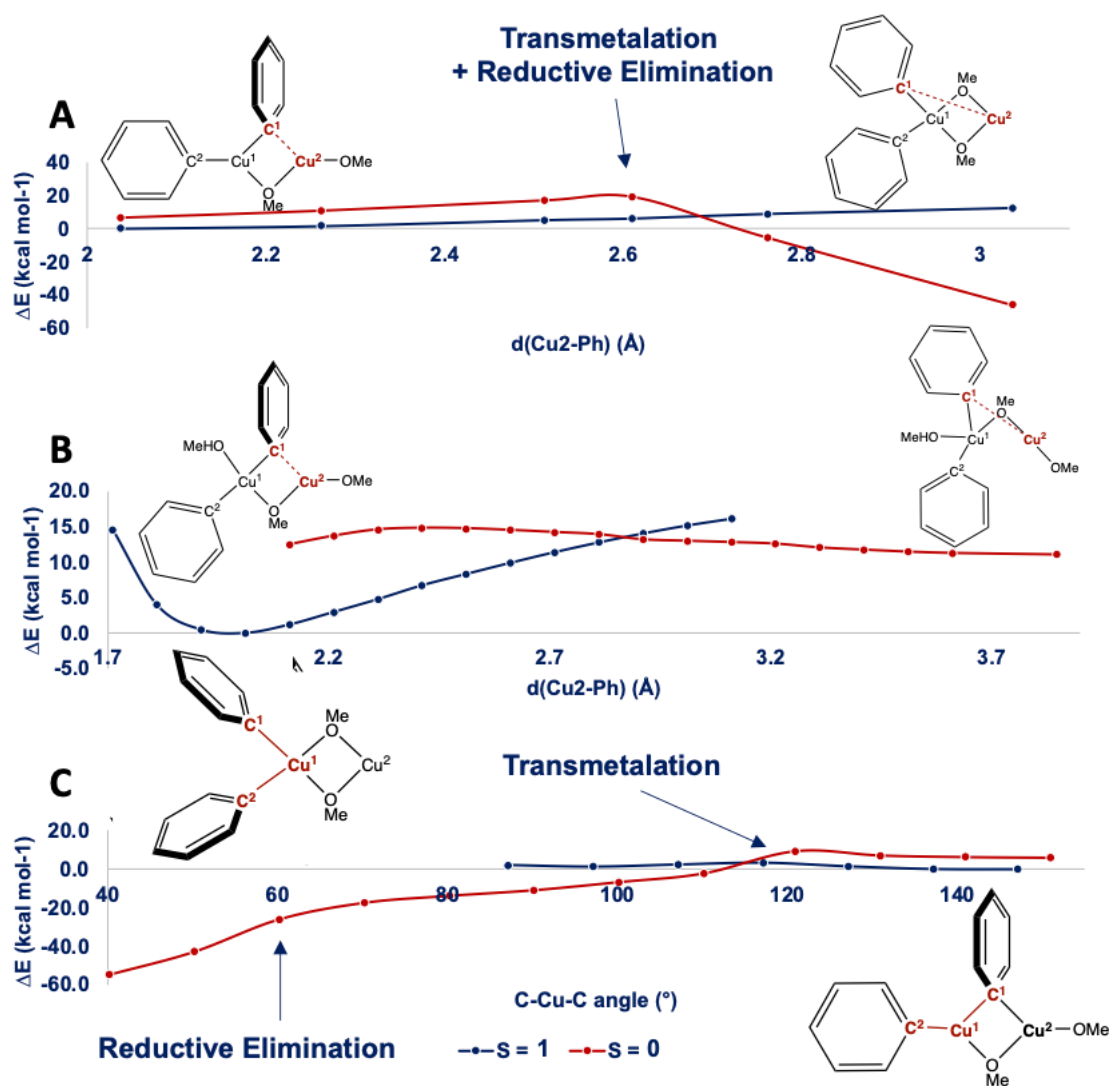

**Figure S18.** Scans of the triplet and singlet potential energy surfaces over the  $(\mu\text{-(Ph)C}_{\text{sp}2})\text{-Cu}^2$  distances for  $\text{Cu}^{\text{II}}\text{-Cu}^{\text{II}}$  transmetalation *A*: without any MeOH coordinated, *B*: with a “trapping” MeOH and *C*: over the  $\text{Cu}^{\text{I}}\text{-(}\mu\text{-(Ph)C}_{\text{sp}2})\text{-Cu}^2$  angle starting from complexes **11**<sup>Cl(t)</sup>.

The crossing point between the two spin hypersurfaces ( $S = 0$  and  $S = 1$ ) have been estimated by performing geometry relaxed scans. Initial attempts using the  $(\mu\text{-(Ph)C}_{\text{sp}2})\text{-Cu}^2$  distance spontaneously led to the reductive elimination product and the minimum energy crossing point could not be efficiently determined (**Figure S18-A**). When a MeOH molecule is coordinated to  $\text{Cu}^{\text{I}}$ , the reductive elimination is blocked, and the transmetalation product could be “trapped” by scanning over the  $\mu\text{-(Ph)C}_{\text{sp}2}\text{-Cu}^2$  distance (**Figure S18-B**). When the scans are effectuated over the  $\text{C}^1\text{-Cu}^{\text{I}}\text{-C}^2$  angle, the reductive elimination and transmetalation steps can be properly identified (**Figure S18-C**).

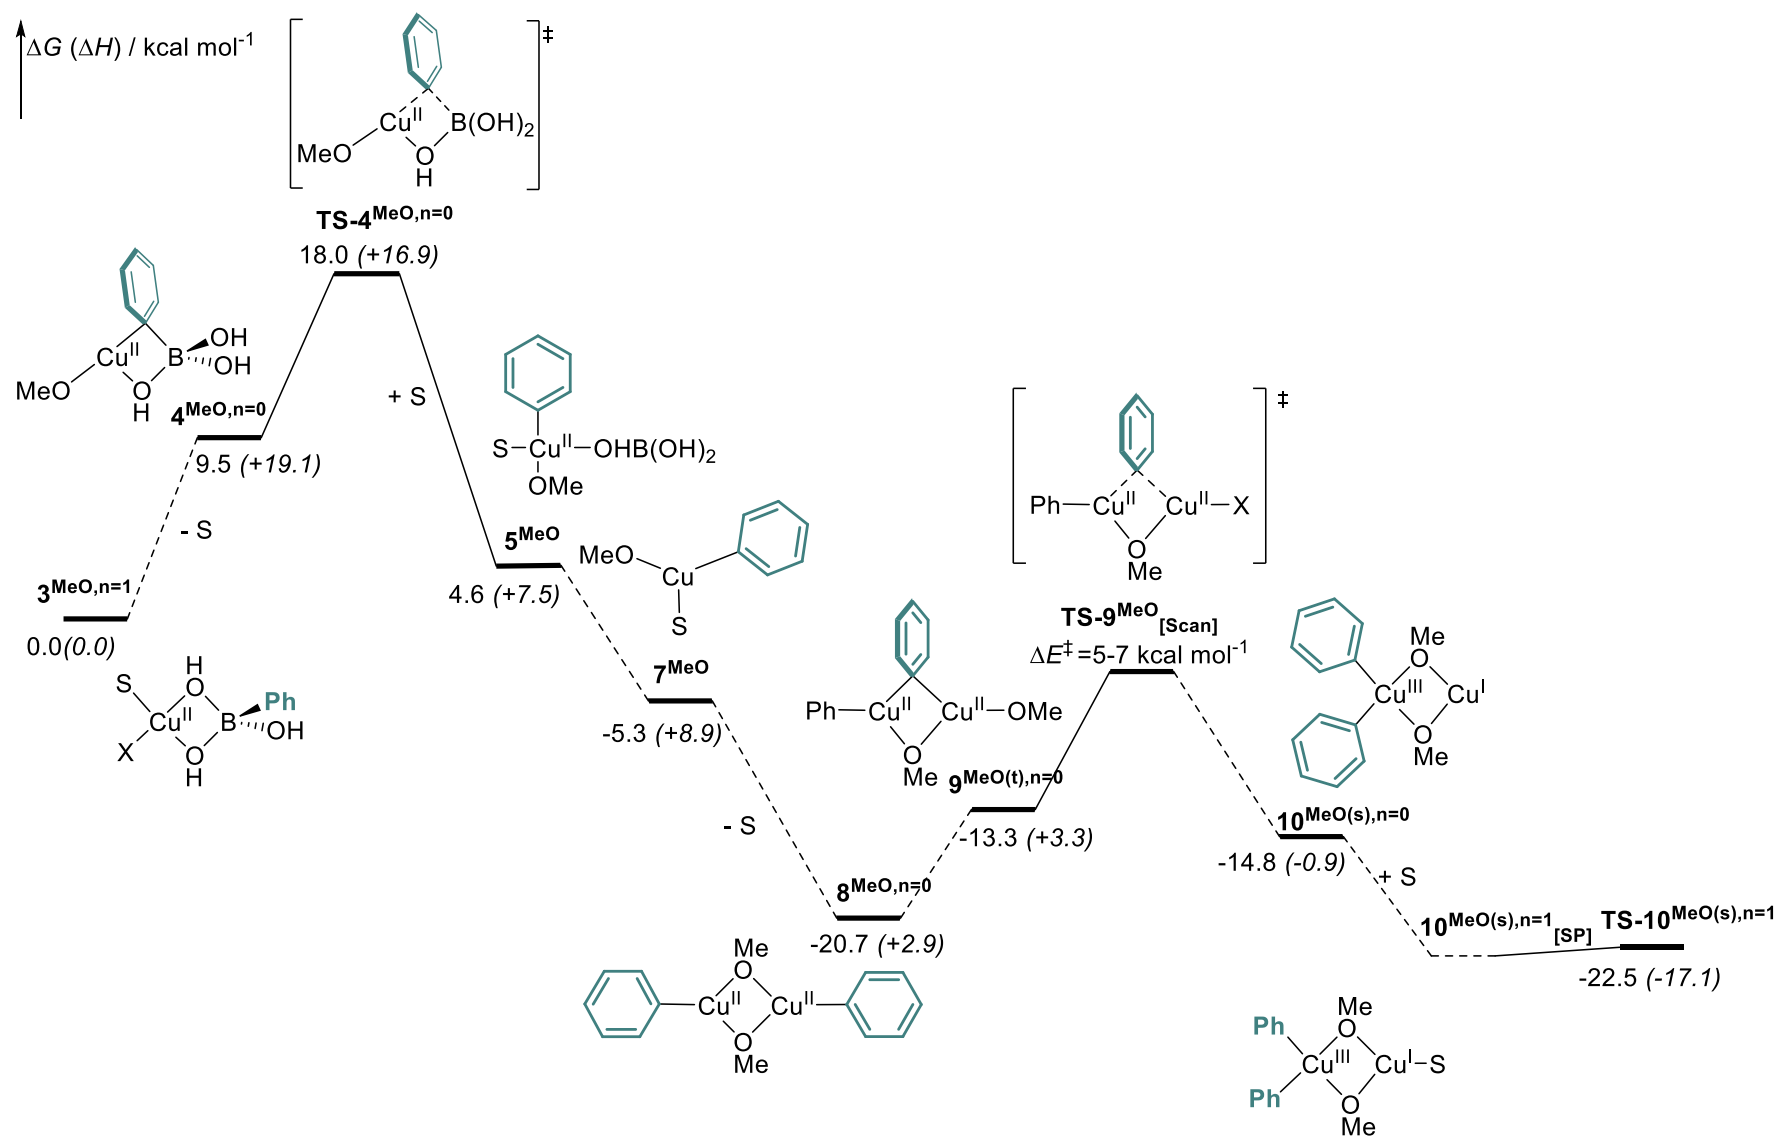

Figure S19. Complete mechanism for homocoupling process computed at the DFT level. Free energies and enthalpies  $\Delta G$  ( $\Delta H$ ) are given in kcal mol<sup>-1</sup>.
